# Supplementary material for: Accuracy of pH strip testing and pH liquid testing versus standard pH meter of gastric contents in critically ill patients: a diagnostic accuracy study
Source: HighWire-hosted journal article supplement (doi:10.1136/bmjopen-2023-081830), 2024-07-01

The Accuracy of pH Strip Testing and pH Liquid Testing Versus Standard pH Meter of Gastric Contents in Critically Ill Patients: A Diagnostic Accuracy Study

Supplementary Information

Supplemental Fig. 1 and Supplemental Table 1 summarize the measurement of gastric pH levels according to the independent raters’ interpretations. For the pH strip testing method, there were no differences in pH level from each rater ( $p=0.55$ ). Rater number 1 reported pH levels of 5.50 (IQR 4.50, 6.00), while raters’ number 2 to number 4 reported the same pH levels of 5.50 (IQR 5.00, 6.00). This figure was also found in the pH liquid testing method ( $p=0.38$ ). Rater number 1 and number 4 reported pH levels of 5.75 (IQR 5.25, 6.50), while rater number 2 and number 3 reported pH levels of 5.75 (IQR 5.25,6.25). The reliability tested by the intraclass correlation coefficients (ICC) of the pH strip testing and the pH liquid test method was 0.93 (95%CI, 0.90, 0.96) and 0.94 (95%CI, 0.90, 0.96), respectively, which indicates excellent performance for both techniques.

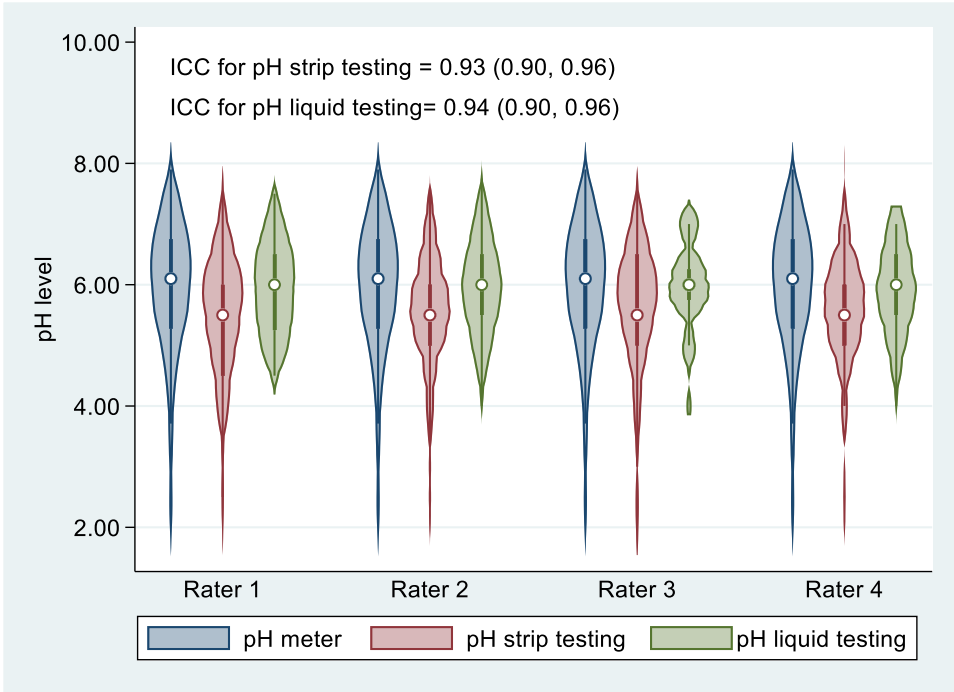

Supplementary Fig. 1 Levels of gastric pH by each method according to independent raters interpretations.

**Supplementary Table 1** Measurement of gastric pH according to the independent raters’ interpretations.

| Measurement    | Rater   | pH level          | p-value* |
|----------------|---------|-------------------|----------|
| pH meter       | -       | 5.83 (5.12, 6.61) | -        |
| pH strip test  | Rater 1 | 5.50 (4.50, 6.00) | 0.55     |
|                | Rater 2 | 5.50 (5.00, 6.00) |          |
|                | Rater 3 | 5.50 (5.00, 6.00) |          |
|                | Rater 4 | 5.50 (5.00, 6.00) |          |
| pH liquid test | Rater 1 | 5.75 (5.25, 6.50) | 0.38     |
|                | Rater 2 | 5.75 (5.25,6.25)  |          |
|                | Rater 3 | 5.75 (5.25,6.25)  |          |
|                | Rater 4 | 5.75 (5.25, 6.50) |          |

\*The p-value was calculated from Friedman statistics.

**Supplemental Fig. 2** Distribution of gastric pH measurement comparing three methods.

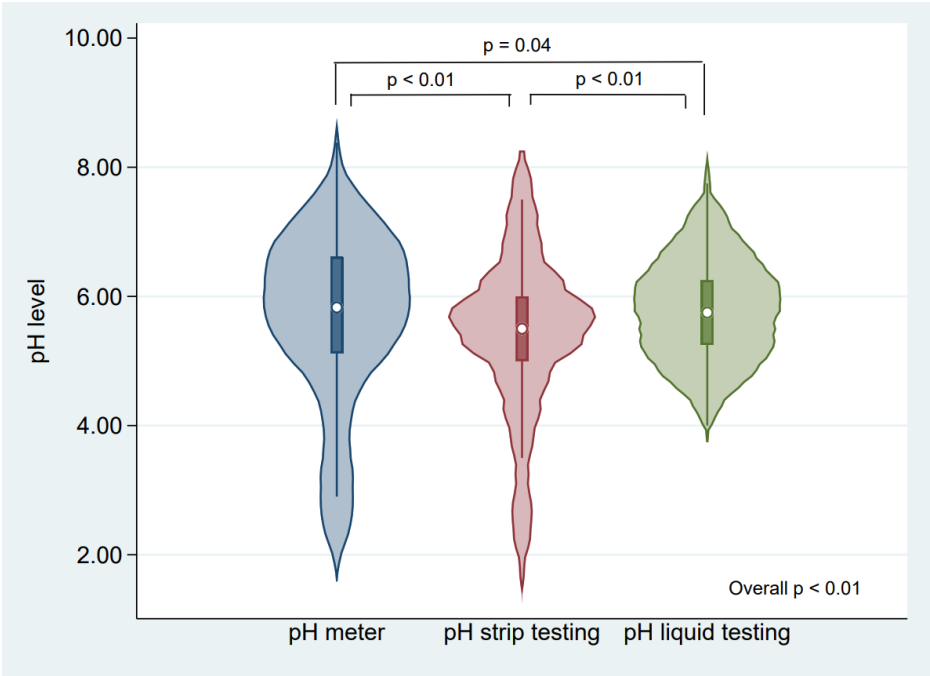

**Supplementary Fig. 3** Histogram of the distribution of gastric pH level according to the pHM test and the pHL test vs. the pHM test.

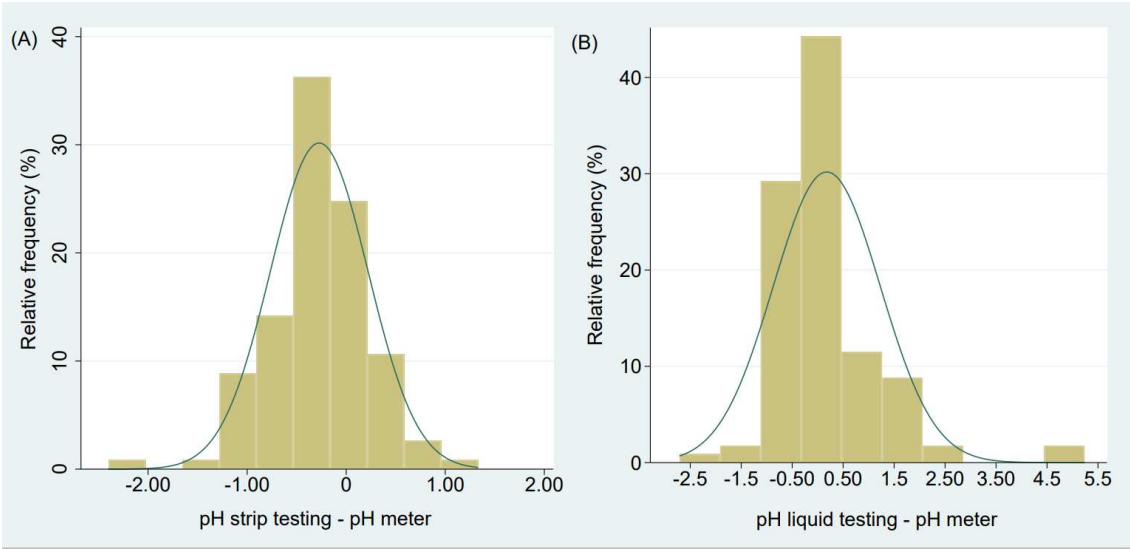

Supplement: bmjopen-2023-081830supp001_data_supplement.pdf [file bmjopen-2023-081830supp001_data_supplement.pdf]
